# Supplementary material
Source: publisher figshare collection journal article supplement (https://acs.figshare.com/ndownloader/files/3624831)
Supplement: Supplementary file 1 [file 3624831]

# **Direct Evaluation of the Quantum Confinement Effect in Single Isolated Ge Nanocrystals**

Oded Millo,\*<sup>1</sup> Isacc Balberg,\*<sup>1</sup> Doron Azulay,<sup>1</sup> Tapas K. Purkait,<sup>2</sup> Anindya K.

Swarnakar,<sup>2</sup> Eric Rivard,<sup>2</sup> and Jonathan G. C. Veinot,\*<sup>2,3</sup>

*<sup>1</sup>Racah Institute of Physics and the Center for Nanoscience and Nanotechnology, The Hebrew University of Jerusalem, Jerusalem 91904, Israel*

*<sup>2</sup>Department of Chemistry, University of Alberta, Edmonton, Alberta T6G 2G2, Canada*

*<sup>3</sup>NRC-National Institute for Nanotechnology, Edmonton, Alberta, T6G 2M9, Canada*

## **Supporting Information**

Additional tunneling spectra are presented here and referenced to from the main text.

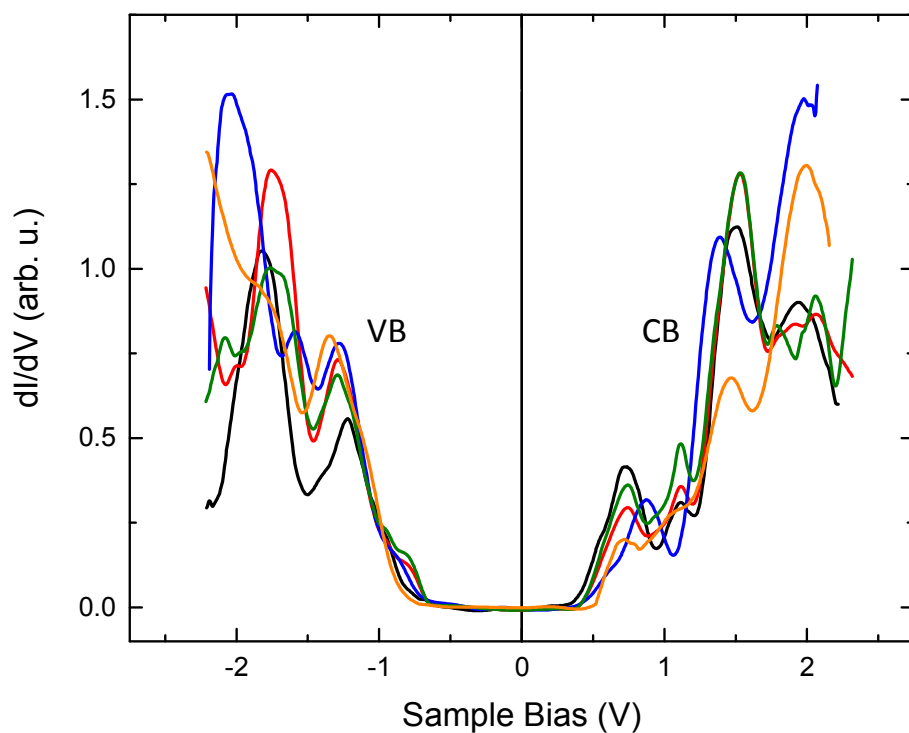

**Figure S1.** Tunneling spectra measured on five different 3-dimethylamino-1-propyne capped Ge NCs, 5.5 ( $\pm 0.2$ ) nm in diameter, all exhibiting n-type doping. This is manifested by the position of the chemical potential (zero bias), which is much closer to the conduction band (CB) than to the valence band (VB).

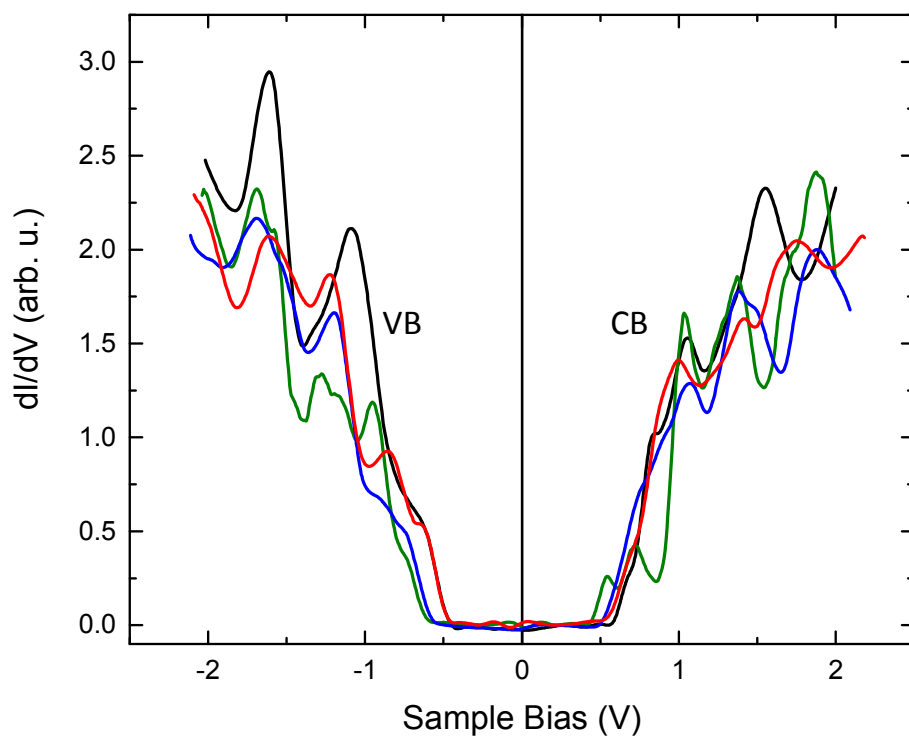

**Figure S2:** Tunneling spectra measured on four 7.75 ( $\pm 0.3$ ) nm Ge-NCs capped by 2-dedaconane. Unlike the case of Fig. S1, doping effect cannot be seen here. The chemical potential is positioned near the band-gap center, with slight shifts towards either the conduction band or valence band.

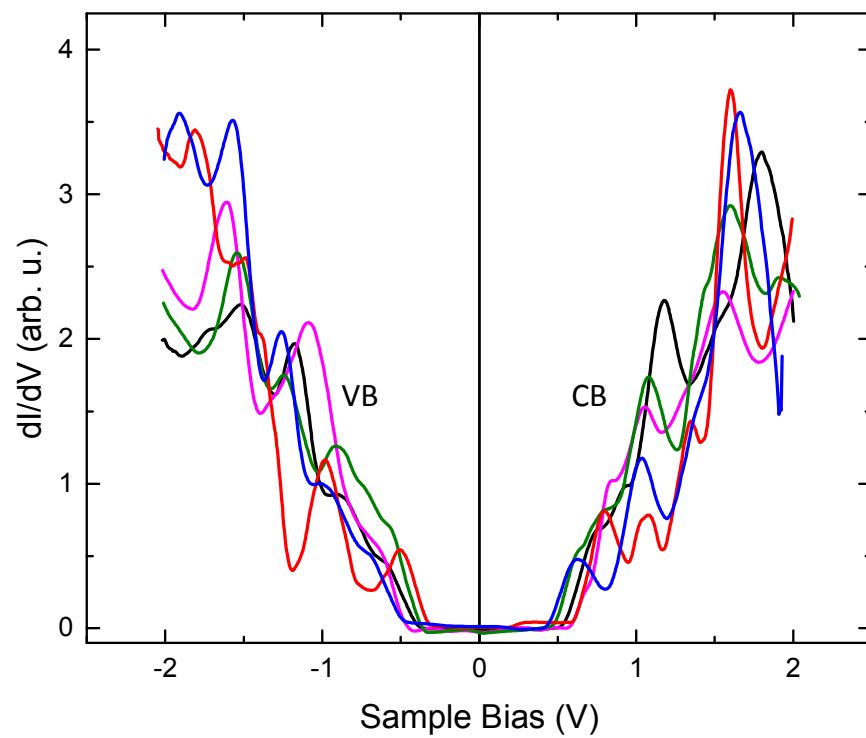

**Figure S3:** Tunneling spectra measured on five 10 ( $\pm 0.5$ ) nm Ge-NCs capped by dodecyl. Here too there is no evidence for doping.

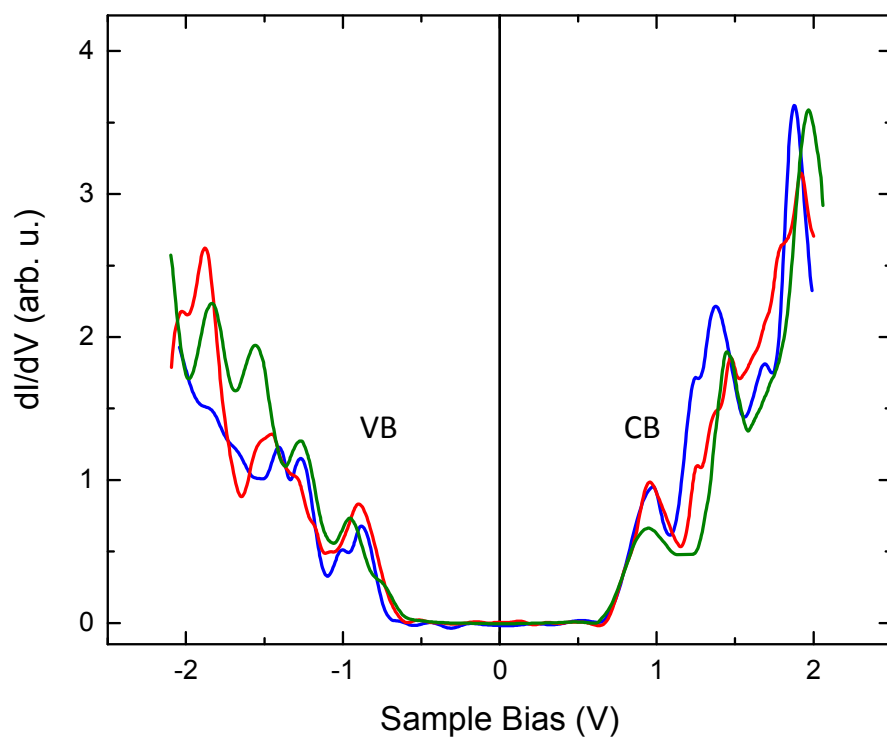

**Figure S4:** Tunneling spectra measured on three 4 ( $\pm 0.2$ ) nm Ge-NCs capped by dodecyl. Here too there is no evidence for doping.
